# Supplementary material for: Reproductive resilience: pathways to gametogenic success in Montipora capitata after bleaching
Source: Springer Nature journal article supplement (doi:10.1038/s41598-024-78768-7), 2024-11-12

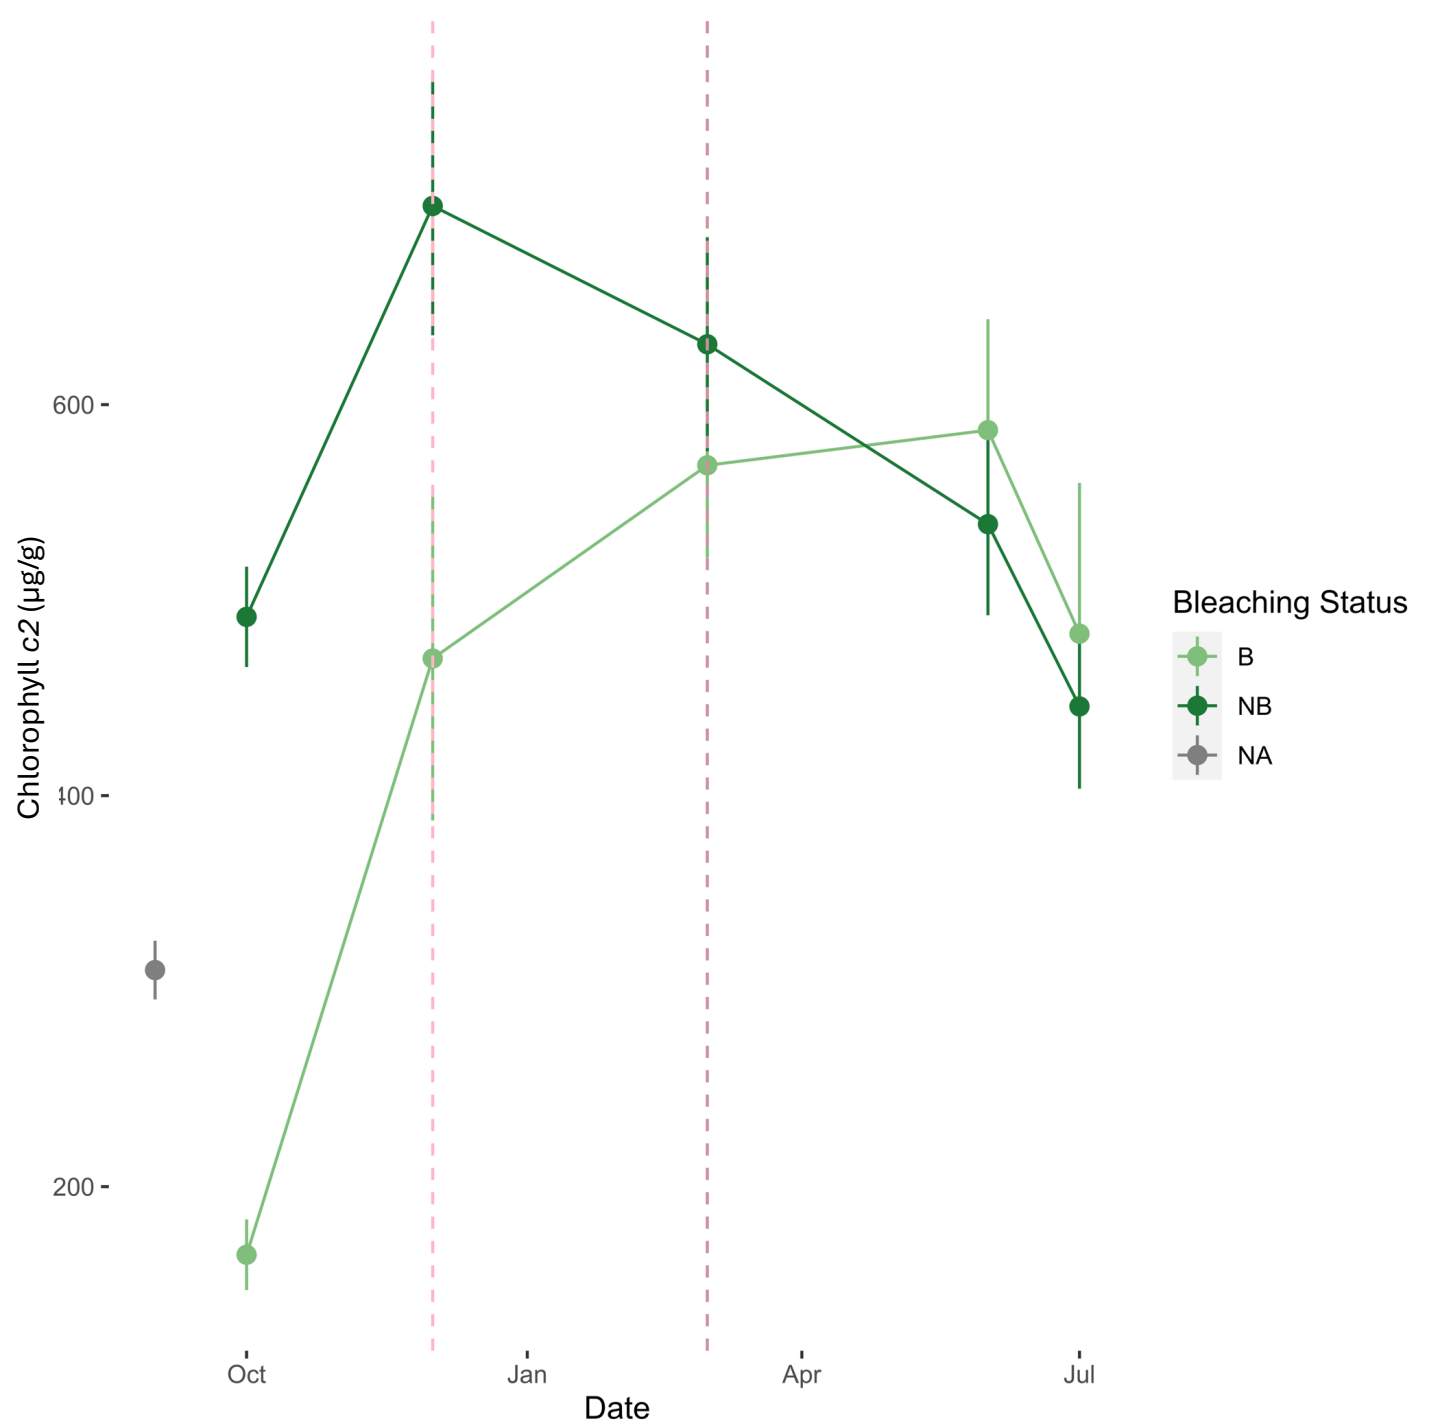

Supplement: 41598_2024_78768_MOESM1_ESM.pdf [file 41598_2024_78768_MOESM1_ESM.pdf]
