# Supplementary material for: Reproductive resilience: pathways to gametogenic success in Montipora capitata after bleaching
Source: Springer Nature journal article supplement (doi:10.1038/s41598-024-78768-7), 2024-11-12
Supplement: 41598_2024_78768_MOESM3_ESM.pdf [file 41598_2024_78768_MOESM3_ESM.pdf]

Sept.

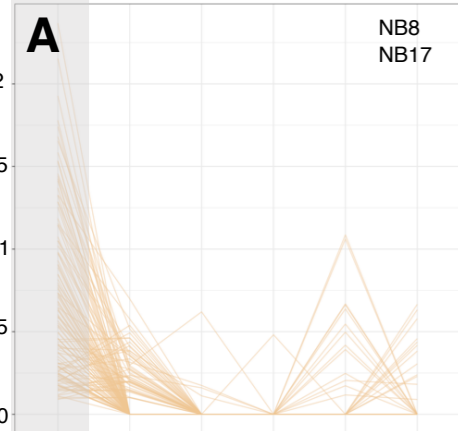

Oct.

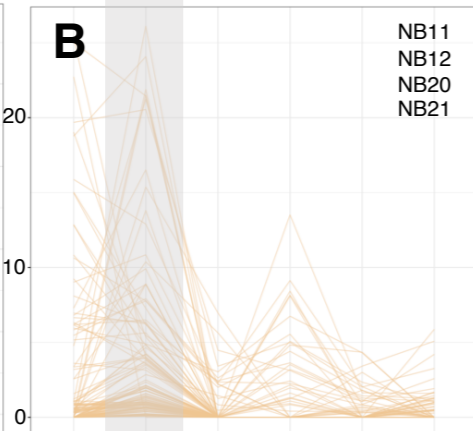

Dec.

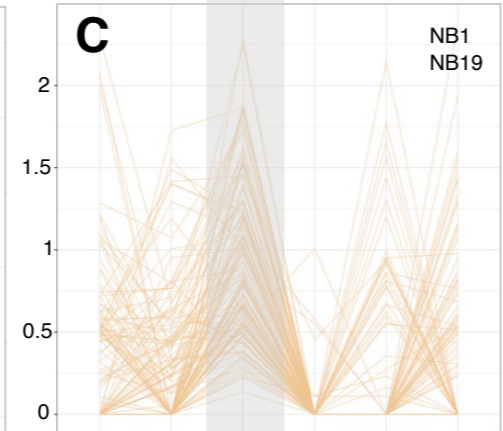

Mar.

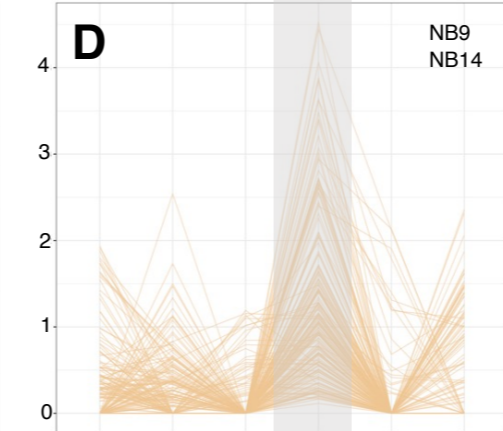

Jun.

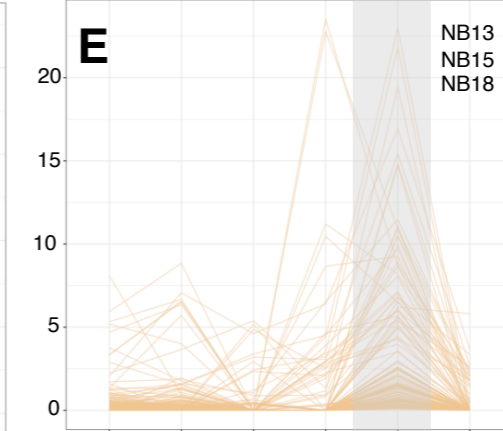

Jul.

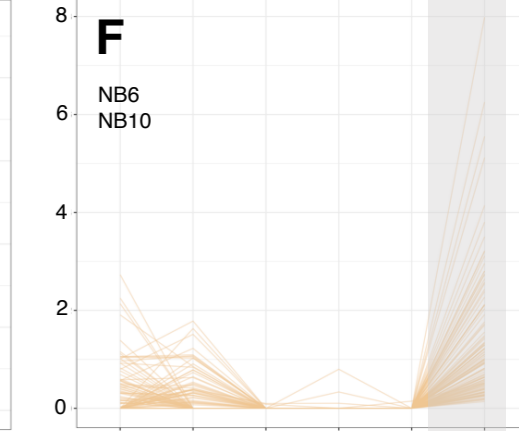

**G**

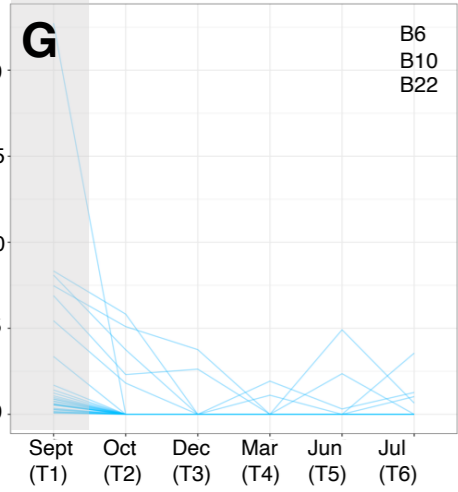

**H**

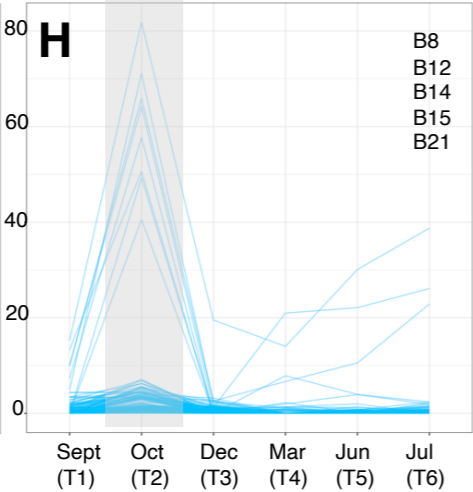

**I**

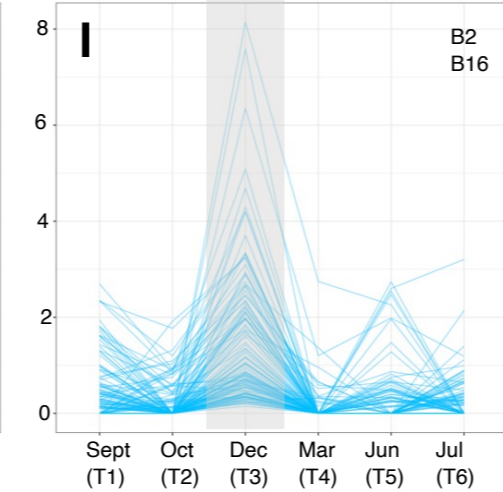

**J**

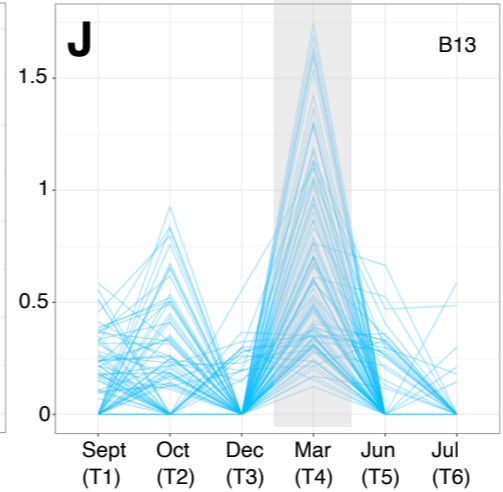

**K**

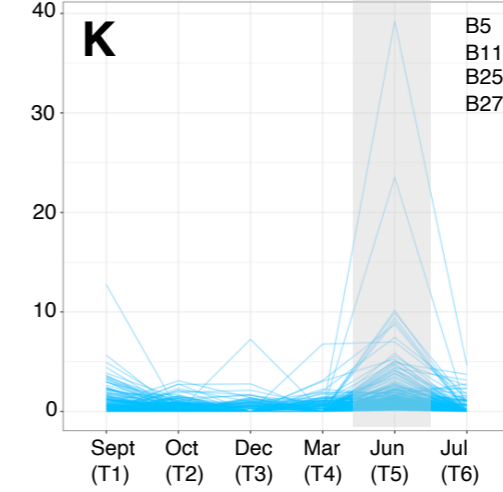

**L**

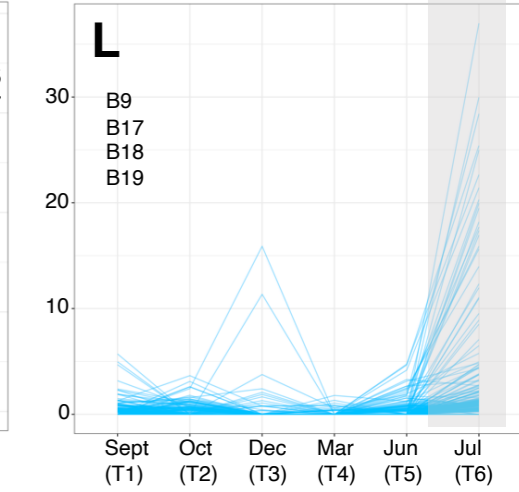

Sept (T1) Oct (T2) Dec (T3) Mar (T4) Jun (T5) Jul (T6)

Sept (T1) Oct (T2) Dec (T3) Mar (T4) Jun (T5) Jul (T6)

Sept (T1) Oct (T2) Dec (T3) Mar (T4) Jun (T5) Jul (T6)

Sept (T1) Oct (T2) Dec (T3) Mar (T4) Jun (T5) Jul (T6)

Sept (T1) Oct (T2) Dec (T3) Mar (T4) Jun (T5) Jul (T6)

Sept (T1) Oct (T2) Dec (T3) Mar (T4) Jun (T5) Jul (T6)
