# Supplementary material for: Reproductive resilience: pathways to gametogenic success in Montipora capitata after bleaching
Source: Springer Nature journal article supplement (doi:10.1038/s41598-024-78768-7), 2024-11-12
Supplement: 41598_2024_78768_MOESM4_ESM.pdf [file 41598_2024_78768_MOESM4_ESM.pdf]

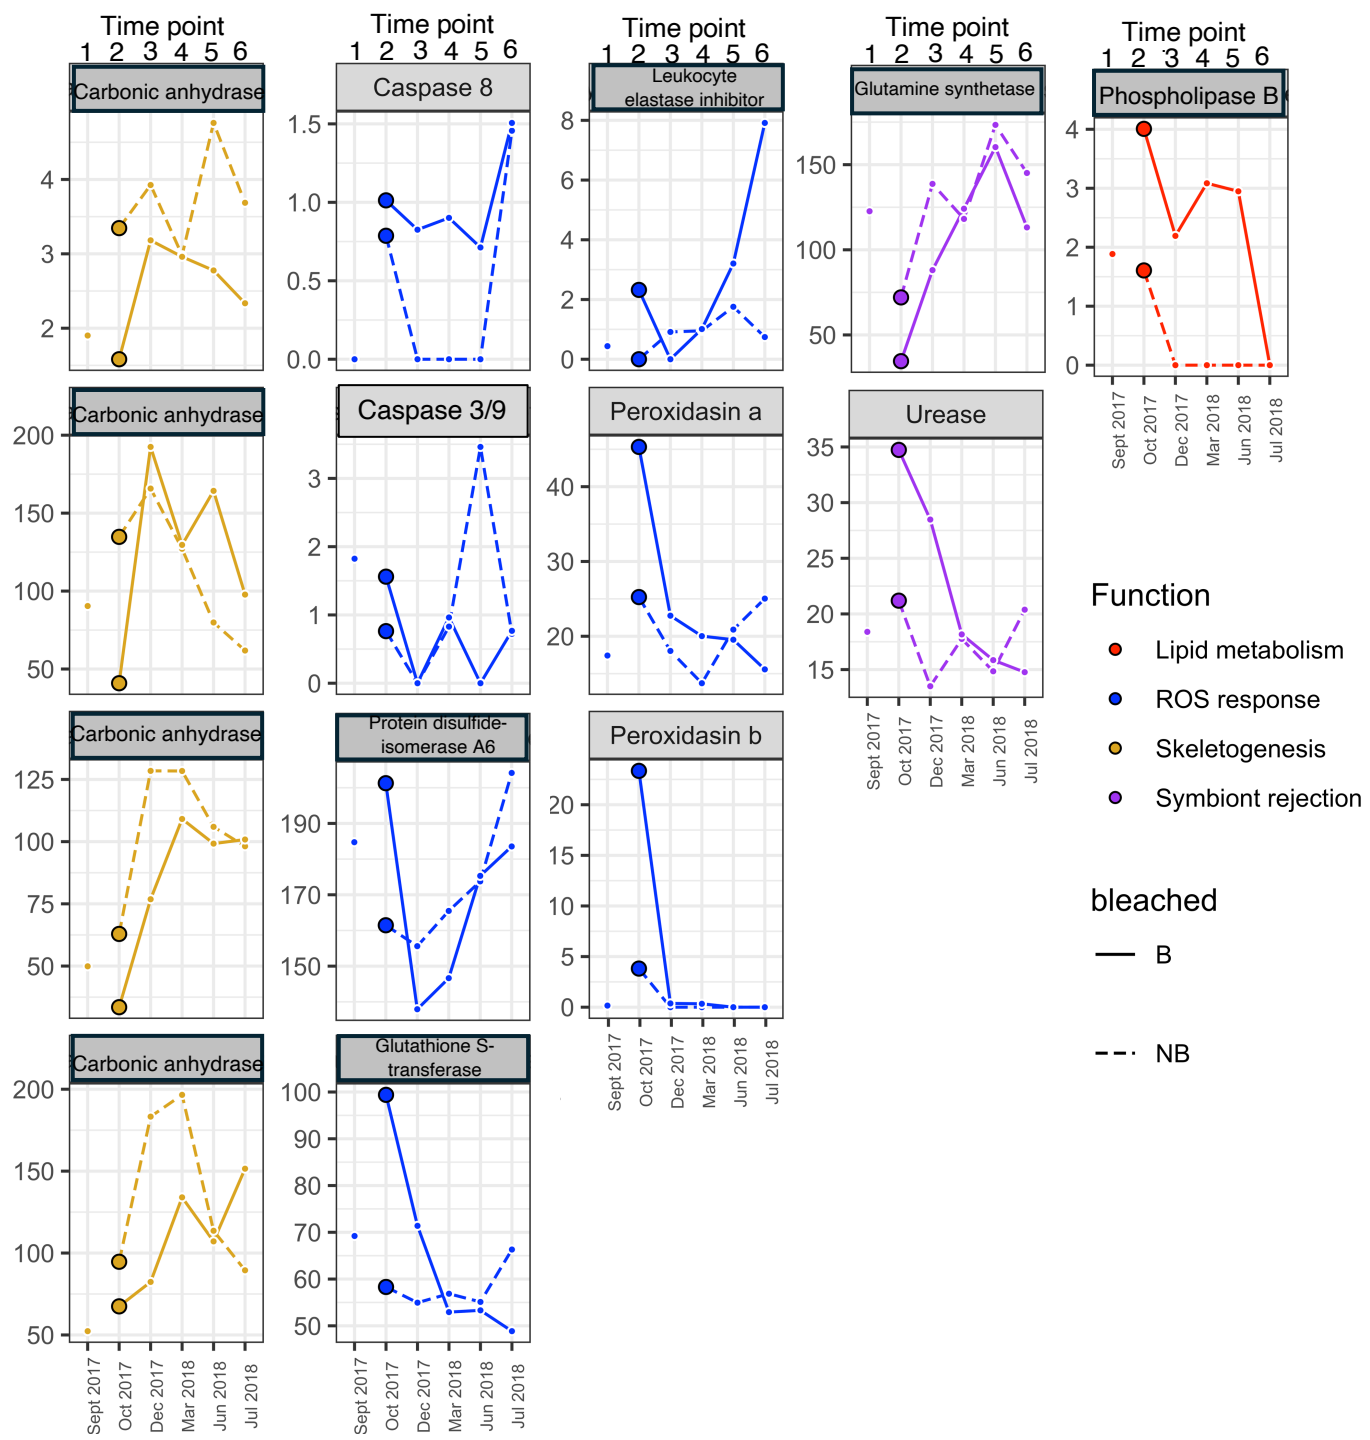

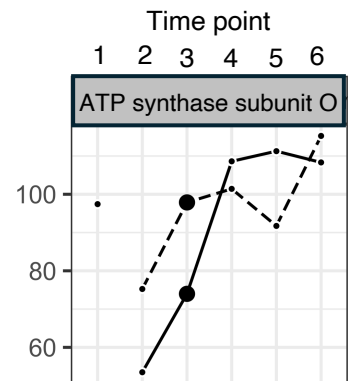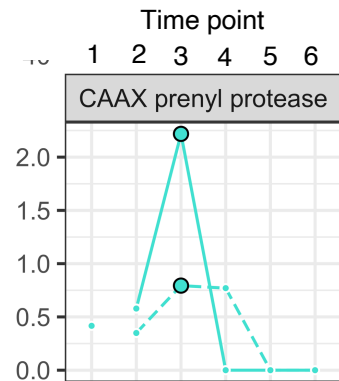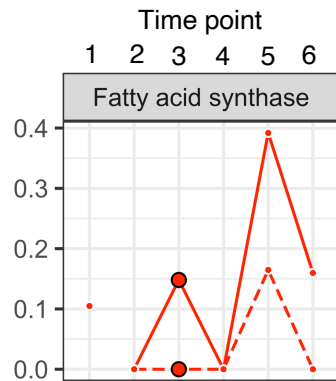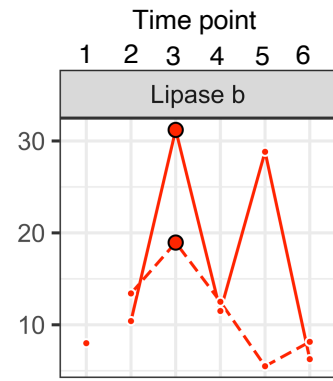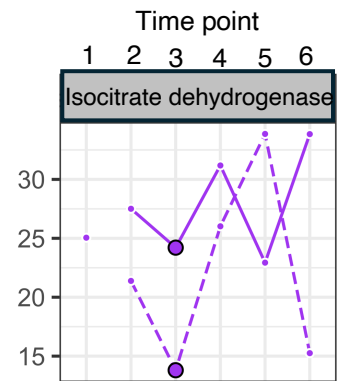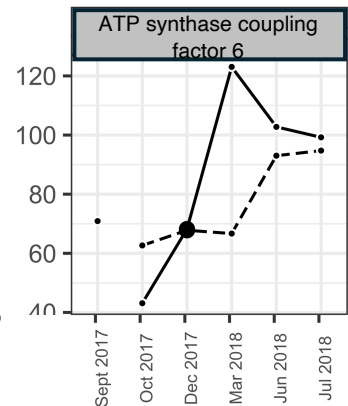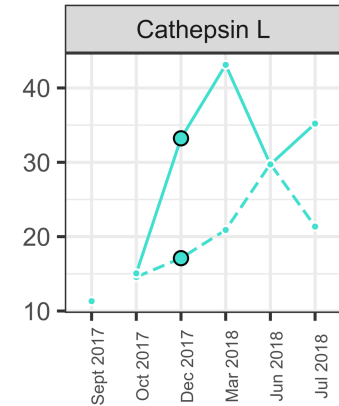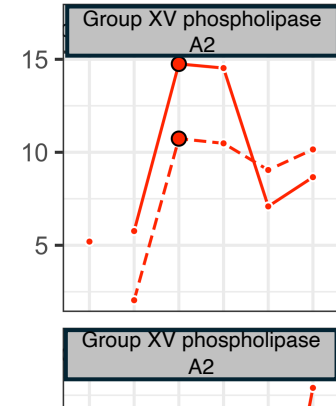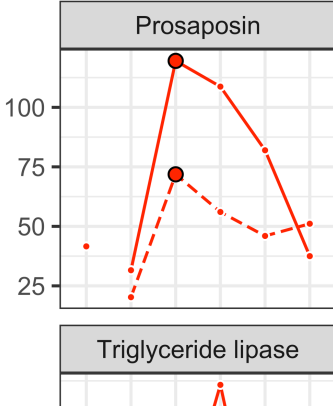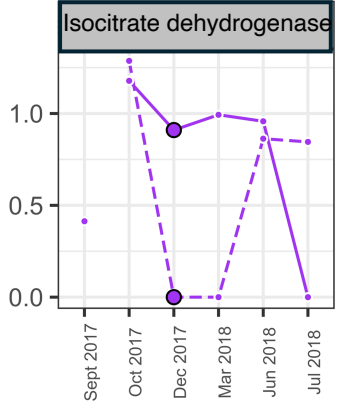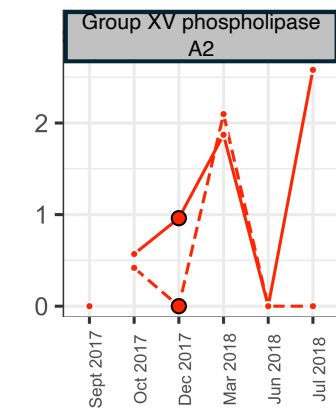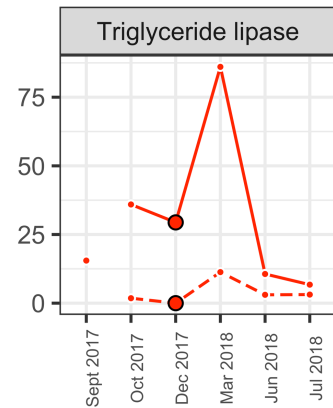

- Energy production
- Lipid metabolism
- Peptide metabolism
- Symbiont rejection

- bleached
- B
  - NB

1. Vitellogenin domain-containing protein
2. Zona pellucida sperm binding protein 2
3. Vitellogenin
4. Vitellogenin
5. CUB and zona pellucida-like domain containing protein
6. CUB and zona pellucida-like domain containing protein
7. 17B hydroxysteroid dehydrogenase
8. Hydroxysteroid 11-beta-dehydrogenase
9. Hydroxysteroid dehydrogenase
10. Protein flightless-1
11. Steroid 17-alpha-hydroxylase
12. Steroidogenic acute regulatory protein
13. Lipase
14. Saposin B-type domain-containing protein
15. Phospholipase A2
16. Phospholipase B
17. Phospholipase D3
18. Centrin-3
19. Nucleosome remodeling factor subunit BPTF
20. SAP domain-containing protein
21. FMRF-amide neuropeptide
22. UPAR/Ly6 domain-containing protein
23. Collagen triple helix repeat-containing protein 1
24. Zinc metalloproteinase mas-15
25. Ras-related protein Rab11a
26. Succinate-semialdehyde dehydrogenase
27. 26S proteasome non-ATPase regulatory subunit 3

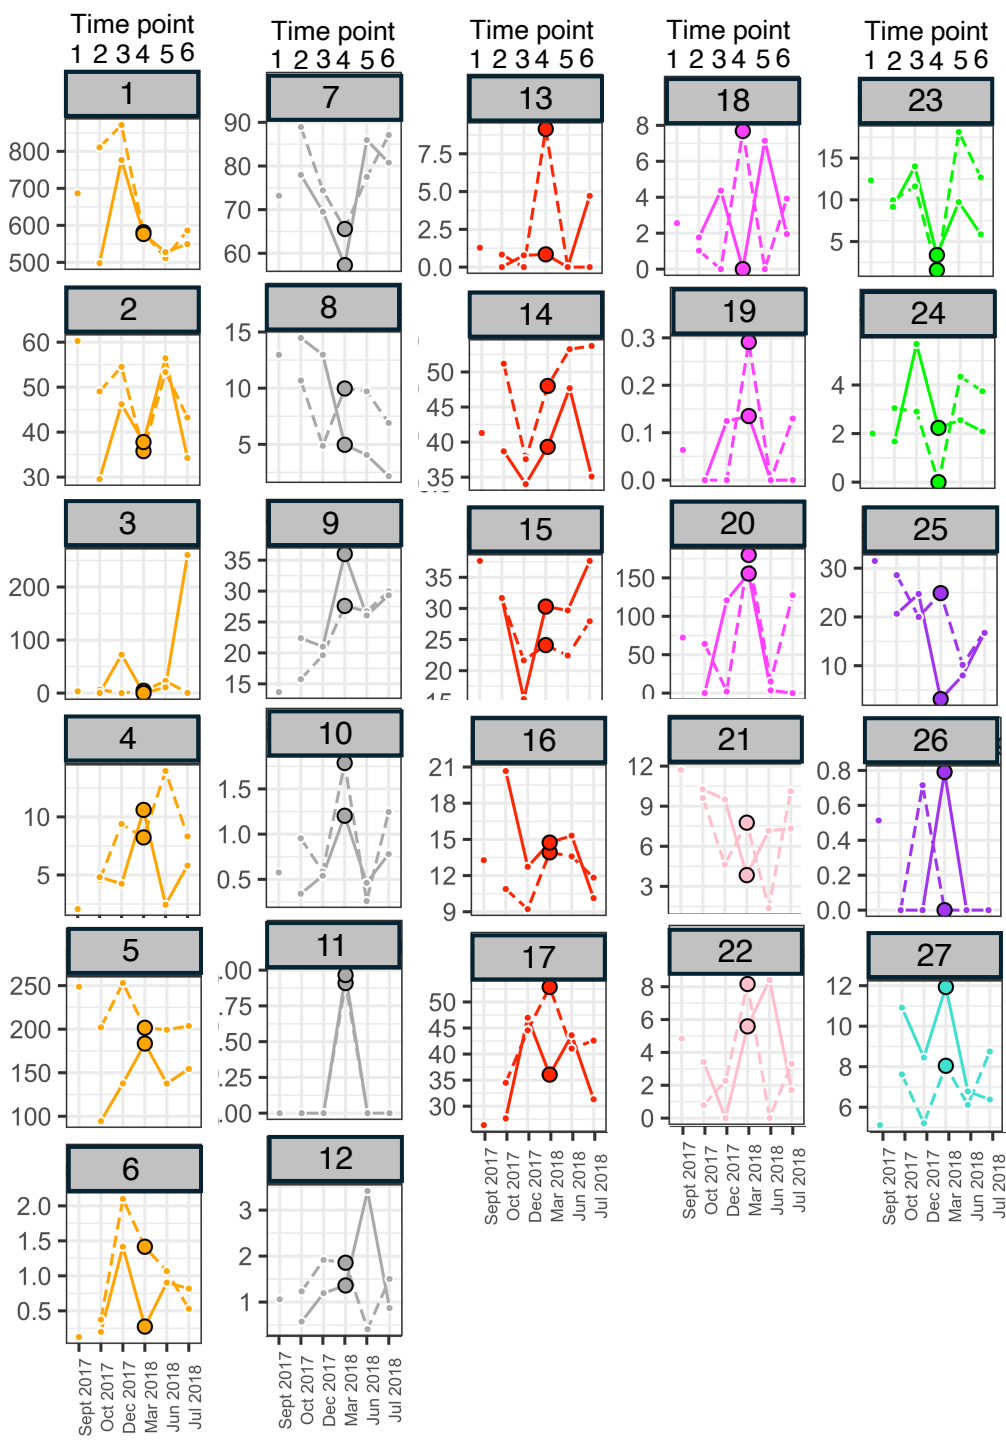

bleached

— B

- - - NB

Function

● DNA replication

● ECM

○ Hormones

● Lipid metabolism

○ Neuronal signaling

● Oogenesis

● Peptide metabolism

● Symbiont rejection
